# Supplementary material
Source: publisher site journal article supplement (https://www.dovepress.com/article/398134)
Supplement: Supplementary file 1 [file get_supplementary_file.php]

## Supporting Information

**Supplement Table 1. Inclusion and exclusion criteria for our study**

| <b>Inclusion</b>                                                                                                                                                                                                                                                                                                                                                                                                                                                                                                                                                                                                                                               | <b>Exclusion</b>                                                                                                                                                                                                                                                                                                                                                                                                                                                                                                 |
|----------------------------------------------------------------------------------------------------------------------------------------------------------------------------------------------------------------------------------------------------------------------------------------------------------------------------------------------------------------------------------------------------------------------------------------------------------------------------------------------------------------------------------------------------------------------------------------------------------------------------------------------------------------|------------------------------------------------------------------------------------------------------------------------------------------------------------------------------------------------------------------------------------------------------------------------------------------------------------------------------------------------------------------------------------------------------------------------------------------------------------------------------------------------------------------|
| <p>*IgAV diagnostic criteria</p> <ol style="list-style-type: none"><li>1. Palpable purpura, not thrombocytopenic/petechiae</li><li>2. Diffuse abdominal pain</li><li>3. Histopathology<br/>Typical LCV with predominant IgA deposits or proliferative glomerulonephritis with predominant IgA deposits</li><li>4. Arthritis or arthralgias</li><li>5. Renal involvement<br/>Proteinuria: &gt;0.3g/24h or &gt;30 mmol/mg of urine albumin to creatinine ratio on a spot morning sample;<br/>Hematuria, red blood cell casts: &gt;5 red cells per high power field or <math>\geq 2+</math> on dipstick or red blood cell casts in the urinary sediment</li></ol> | <p>Skin eruption caused by trauma, idiopathic thrombocytopenic purpura, vasculitis and other factors</p> <p>Abdominal pain caused by acute abdominal symptoms, chronic gastroenteritis, urticaria, etc</p> <p>Joint pain caused by gout, rheumatoid / rheumatoid arthritis, ankylosing spondylitis, osteoarthritis, developmental deformity and other factors</p> <p>Kidney diseases caused by nephrotic syndrome, lupus, hepatitis B, diabetes, nephritis, severe infection, tumor, drugs and other factors</p> |

\*1 and one of the following

**Supplement Table 2. Different clinical phenotypes of IgAV**

| <b>Clinical phenotype</b>           | <b>Criteria</b>                                                                                                                                                            |
|-------------------------------------|----------------------------------------------------------------------------------------------------------------------------------------------------------------------------|
| <b>Skin-limited (purpura)</b>       | Only skin palpable epilepsy was present, and evidence of other system involvement was excluded                                                                             |
| <b>Gastrointestinal involvement</b> | Skin palpable epilepsy with digestive system symptoms (abdominal pain, stool occult blood positive, intussusception, intestinal obstruction, intestinal perforation, etc.) |
| <b>Joint involvement</b>            | Skin palpable epilepsy with swelling, pain / tenderness or arthritis in and around joints, with limited movement                                                           |
| <b>Kidney involvement</b>           | Skin palpable epilepsy with kidney injury (hematuria, proteinuria, tubular urine, hypertension, etc.)                                                                      |
| <b>Multiple system involvement</b>  | Except for simplex type, two or more of the other three types exist at the same time                                                                                       |

**Supplement Table 3. Multivariate analysis of clinical characteristics of healthy control group and IgAV patients**

| <b>Variable</b> | <b><math>\beta</math></b> | <b>SE</b> | <b>Wald <math>\chi^2</math></b> | <b><i>P</i></b> | <b>OR(95%CI)</b>    |
|-----------------|---------------------------|-----------|---------------------------------|-----------------|---------------------|
| ALT             | 0.028                     | 0.012     | 5.734                           | 0.017           | 1.028(1.005,1.052)  |
| Alb             | -0.271                    | 0.039     | 47.225                          | <0.001          | 0.763(0.706,0.824)  |
| MHR             | 1.493                     | 0.749     | 3.973                           | 0.046           | 4.451(1.025,19.322) |

*P*<0.05, the difference was statistically significant.

**Supplement Table 4. Comparison of clinical characteristics of Different clinical phenotypes of IgAV**

| Clinical items                | Overall              | IgAV                  |                                     |                          |                           |                                    | P value |
|-------------------------------|----------------------|-----------------------|-------------------------------------|--------------------------|---------------------------|------------------------------------|---------|
|                               |                      | Skin-limited (n=28)   | Gastrointestinal Involvement (n=26) | Joint Involvement (n=11) | Kidney Involvement (n=39) | Multiple system Involvement (n=54) |         |
| Male, %                       | 74(46.84%)           | 8(28.57%)             | 17(65.38%)                          | 4(36.36%)                | 14(35.90%)                | 31(57.41%)                         | 0.016   |
| Age,years                     | 43.3±22.55           | 53.07±24.39           | 34.19±17.43                         | 43.18±21.54              | 42.13±23.97               | 43.5±21.65                         | 0.045   |
| BMI                           | 22.21±3.92           | 21.94±2.73            | 20.85±4.28                          | 24.57±5.81               | 23.16±3.51                | 21.61±3.76                         | 0.087   |
| Disease duration              | 19.5(7,75)           | 11.5(3,45)            | 15(8,20)                            | 7(4,14)                  | 90(10,720)                | 18(9,45)                           | 0.001   |
| WBC,10 <sup>9</sup> /L        | 7.2(5.48,9.79)       | 5.22(4.42,6.8)        | 10.22(8.3,13.14)                    | 5.74(4.57,10.51)         | 6.65(5.48,9.03)           | 8.39(6.13,11.43)                   | <0.001  |
| PLT,10 <sup>9</sup> /L        | 221(159,284)         | 208(125,258)          | 270(221,331)                        | 1.38(1.21,1.73)          | 214(172,267)              | 246(188,288)                       | <0.001  |
| Lymphocyte,10 <sup>9</sup> /L | 1.64(1.24,2.06)      | 1.39(1.11,1.82)       | 1.45(1.26,1.84)                     | 3.67(2.56,7.33)          | 1.87(1.42,2.43)           | 1.4(1.17,1.94)                     | <0.001  |
| Neutrophil,10 <sup>9</sup> /L | 4.37(2.86,6.64)      | 3.48(2.47,4.37)       | 8.07(5.81,10.92)                    | 0.08(0.02,0.2)           | 4.16(3.62,5.24)           | 4.7(3.26,7.71)                     | <0.001  |
| Eosinophil,10 <sup>9</sup> /L | 0.12(0.04,0.22)      | 0.13(0.06,0.19)       | 0.1(0.03,0.21)                      | 6.2(4.9,8.9)             | 0.1(0.05,0.16)            | 0.09(0.02,0.19)                    | <0.001  |
| Monocyte,10 <sup>9</sup> /L   | 0.39(0.31,0.59)      | 0.36(0.3,0.48)        | 0.6(0.36,0.66)                      | 0.94(0.33,2.32)          | 0.39(0.29,0.56)           | 0.39(0.31,0.56)                    | 0.025   |
| D-Dimer                       | 2.64(0.46,7.87)      | 0.74(0.36,2.85)       | 3.4(1.05,7.87)                      | 268(179,311)             | 0.42(0.22,3.46)           | 4.29(1.91,9.5)                     | <0.001  |
| PCT,ng/L                      | 0.05(0.04,0.08)      | 0.05(0.04,0.12)       | 0.05(0.03,0.12)                     | 0.02(0.02,0.02)          | 0.06(0.05,1.15)           | 0.05(0.04,0.07)                    | 0.064   |
| CRP,mg/L                      | 10.6(5,25.3)         | 7.27(2.42,11.35)      | 21.3(5.4,35.85)                     | 11.1(4.91,20)            | 4.49(2.56,10.2)           | 19.3(7.39,35.6)                    | 0.015   |
| *NLR                          | 2.84(1.86,4.79)      | 2.35(1.66,3.47)       | 5.71(3.52,8)                        | 2.44(1.61,4.19)          | 2.24(1.71,3.53)           | 3.16(1.94,4.68)                    | <0.001  |
| *PLR                          | 143.51(106.45,213.3) | 126.98(113.57,165.25) | 175.79(119.34,249.15)               | 183.33(86.86,236.81)     | 127.25(100.14,173.1)      | 149.28(102.72,229.78)              | 0.088   |
| Creatinine,umol/L             | 65(55,79)            | 60(53,70.5)           | 68(60,83)                           | 56(51,62)                | 70(57,83)                 | 66(55,79.5)                        | 0.030   |
| Urea nitrogen,mmol/L          | 4.8(3.8,6.2)         | 5(3.7,6.05)           | 4.2(3.4,7.7)                        | 4.2(3.9,4.9)             | 5(3.9,7)                  | 4.9(4.6,95)                        | 0.269   |
| ALT,U/L                       | 19(12,28)            | 15(10,21)             | 23(17,43)                           | 16(11,27)                | 18.5(11,26)               | 22(14,33)                          | 0.048   |
| AST,U/L                       | 19(15,24)            | 17(14,20)             | 20(16,27)                           | 17(14,22)                | 19(15,23)                 | 19(15,25)                          | 0.701   |
| Alb,g/L                       | 39(34,43)            | 40(37,43)             | 38(33,42)                           | 41(34,45)                | 39(37,43)                 | 37(32,40)                          | 0.112   |

|                             |                 |                   |                 |                    |                 |                  |       |
|-----------------------------|-----------------|-------------------|-----------------|--------------------|-----------------|------------------|-------|
| Total cholesterol,mmol/L    | 3.8(3.34,4.55)  | 3.75(3.47,4.25)   | 3.57(3.11,4.09) | 3.78(2.77,4.64)    | 3.91(3.37,4.7)  | 3.91(3.34,4.39)  | 0.433 |
| Triglyceride,mmol/L         | 1.15(0.82,1.59) | 1.05(0.78,1.77)   | 1.16(0.91,1.55) | 0.8(0.56,0.92)     | 1.15(0.88,2.03) | 1.17(0.84,1.76)  | 0.061 |
| HDL,mmol/L                  | 1.12(0.9,1.35)  | 1.17(0.99,1.37)   | 1.07(0.9,1.23)  | 1.16(0.97,1.45)    | 1.16(0.89,1.41) | 1.12(0.87,1.34)  | 0.429 |
| LDL,mmol/L                  | 2.33(1.81,2.95) | 2.28(1.81,2.78)   | 2.17(1.66,2.68) | 2.27(1.49,3.08)    | 2.48(1.83,3.06) | 2.4(1.9,2.94)    | 0.647 |
| Apolipoprotein a,g/L        | 1.17(1.01,1.38) | 1.3(1.18,1.49)    | 1.08(0.97,1.19) | 1.16(1.03,1.45)    | 1.25(1.08,1.49) | 1.1(0.93,1.34)   | 0.003 |
| Apolipoprotein b,g/L        | 0.81(0.66,0.98) | 0.73(0.64,1)      | 0.83(0.63,0.98) | 0.82(0.6,1.03)     | 0.85(0.59,1.03) | 0.84(0.69,0.94)  | 0.865 |
| Lipoprotein α,mmol/L        | 146(72,355)     | 91.5(41.5,197)    | 144(96,360)     | 230.5(75.5,482)    | 144(92,288)     | 166.5(54,574)    | 0.441 |
| *AIP                        | 0.02(-0.2,0.2)  | -0.07(-0.17,0.17) | 0.03(-0.1,0.22) | -0.16(-0.38,-0.02) | 0.03(-0.2,0.25) | 0.11(-0.22,0.25) | 0.146 |
| MHR                         | 0.38(0.25,0.53) | 0.31(0.23,0.43)   | 0.51(0.29,0.69) | 0.37(0.27,0.47)    | 0.33(0.2,0.49)  | 0.42(0.28,0.62)  | 0.032 |
| C3,g/L                      | 0.91(0.76,1.1)  | 0.83(0.76,0.97)   | 1.07(0.91,1.43) | 0.84(0.73,1.14)    | 0.98(0.81,1.19) | 0.83(0.71,1.04)  | 0.136 |
| C4,g/L                      | 0.23(0.17,0.28) | 0.23(0.17,0.29)   | 0.33(0.24,0.36) | 0.19(0.13,0.23)    | 0.23(0.17,0.27) | 0.2(0.16,0.28)   | 0.021 |
| IgA,g/L                     | 2.91(2.19,3.76) | 3.05(2.26,3.51)   | 2.86(2.25,3.7)  | 4.62(4.37,5.63)    | 3.07(2.08,3.65) | 2.76(1.92,3.76)  | 0.154 |
| IgG,g/L                     | 11.2(8.99,12.8) | 12.4(10.3,12.8)   | 9.39(9.29,11.7) | 15.2(12.5,19.6)    | 10.7(8.92,12.8) | 11(7.92,12.7)    | 0.042 |
| IgM,g/L                     | 1.04(0.72,1.39) | 1.05(0.95,1.17)   | 1.1(0.67,1.42)  | 1.91(1.48,2.18)    | 1.07(0.88,1.69) | 0.84(0.51,1.26)  | 0.098 |
| Time to First Remission,day | 4.18±2.20       | 3.32±1.28         | 4.4±2.11        | 3.4±1.21           | 4.83±2.55       | 4.40±2.42        | 0.001 |

\*NLR: Neutrophil/Lymphocyte Ratio; PLR: PLT/Lymphocyte Ratio; AIP: Log(Triglyceride/HDL); MHR: Monocyte/HDL Ratio;

a: Compared with skin, the difference was statistically significant; b: Compared with Gastrointestinal involvement, the difference was statistically significant; c: Compared with Joint involvement, the difference was statistically significant; b: Compared with Gastrointestinal involvement, the difference was statistically significant; d: Compared with Kidney involvement, the difference was statistically significant; e: Compared with Multiple system involvement, the difference was statistically significant.

$P < 0.05$ , the difference was statistically significant.

**Supplement Table 5. Multivariate analysis of clinical characteristics between Gastrointestinal involvement and other IgAV patients**

| <b>Variable</b> | <b><math>\beta</math></b> | <b>SE</b> | <b>Wald <math>\chi^2</math></b> | <b><i>P</i></b> | <b>OR(95%CI)</b>   |
|-----------------|---------------------------|-----------|---------------------------------|-----------------|--------------------|
| *PLR            | 0.005                     | 0.002     | 5.486                           | 0.019           | 1.005(1.001,1.009) |
| ALT             | 0.025                     | 0.012     | 4.449                           | 0.035           | 1.026(1.002,1.050) |
| MHR             | 1.099                     | 0.515     | 4.549                           | 0.033           | 3.001(1.093,8.241) |

*P*<0.05, the difference was statistically significant.
